# Supplementary material for: High-performance free-standing PEDOT:PSS electrodes for flexible and transparent all-solid-state supercapacitors
Source: Royal Society of Chemistry journal article supplement (doi:10.1039/c6ta03537j), 2016-01-01
Supplement: c6ta03537j1.pdf [file c6ta03537j1.pdf]

**Electronic Supplementary Material (ESI)**

**This journal is © The Royal Society of Chemistry 2016**

## **High-Performance Free-Standing PEDOT:PSS Electrodes for Flexible and Transparent All-Solid-State Supercapacitors**

Tao Cheng,<sup>a</sup> Yi-Zhou Zhang,<sup>a</sup> Jian-Dong Zhang,<sup>a</sup> Wen-Yong Lai\*<sup>a, b</sup> and Wei Huang<sup>a, b</sup>

<sup>a</sup> Key Laboratory for Organic Electronics & Information Displays (KLOEID) & Institute of Advanced Materials (IAM), Jiangsu National Synergetic Innovation Center for Advanced Materials (SICAM), Nanjing University of Posts & Telecommunications, 9 Wenyuan Road, Nanjing 210023, China

<sup>b</sup> Key Laboratory of Flexible Electronics (KLOFE) & Institute of Advanced Materials (IAM), Jiangsu National Synergetic Innovation Center for Advanced Materials (SICAM), Nanjing Tech University, 30 South Puzhu Road, Nanjing 211816, China.

\* E-mail: iamwylai@njupt.edu.cn

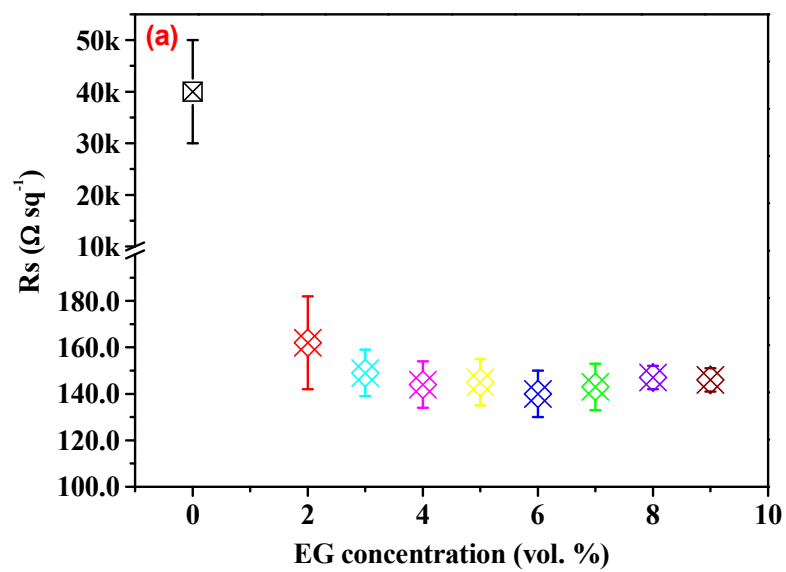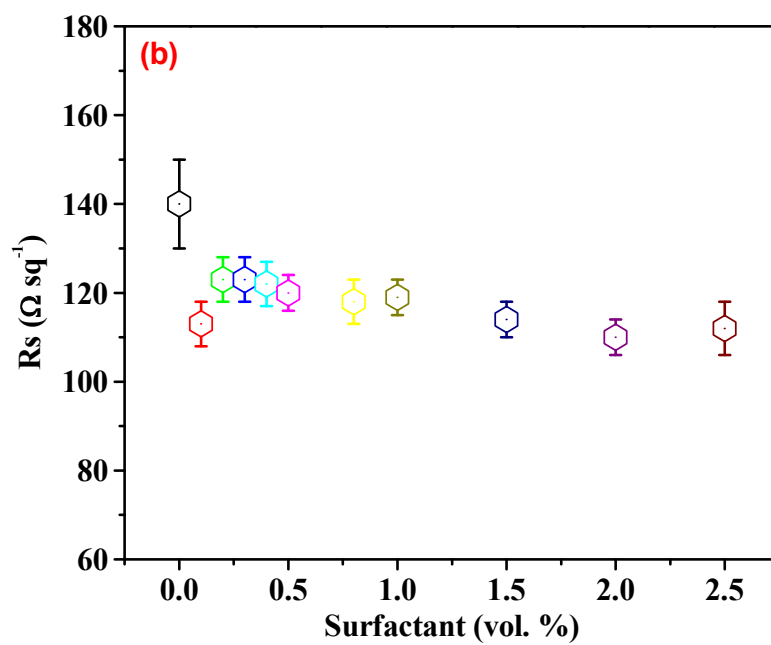

**Fig. S1.** The sheet resistance of the PEDOT:PSS layer changing with the amount of the doped EG (a) and the surfactant (b).

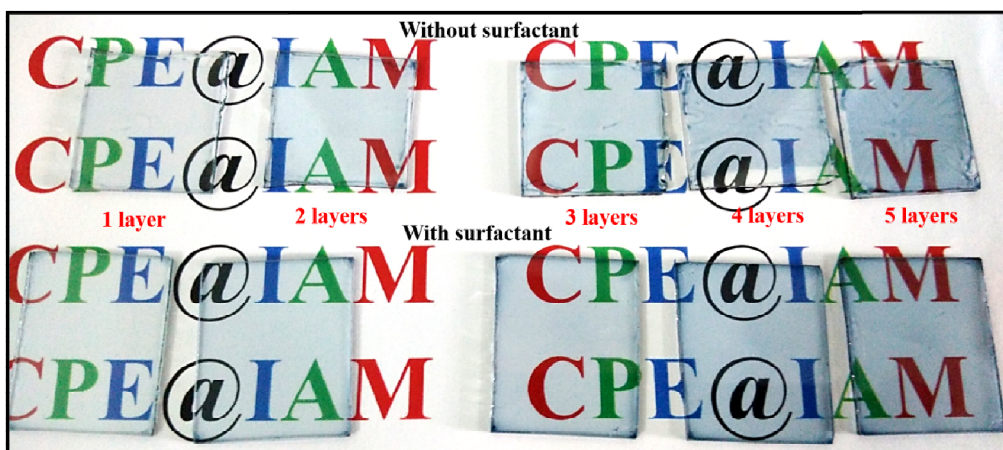

**Fig. S2.** Morphology of the multilayer coated 6 vol. % doped PEDOT:PSS with (top) and without (bottom) surfactant.

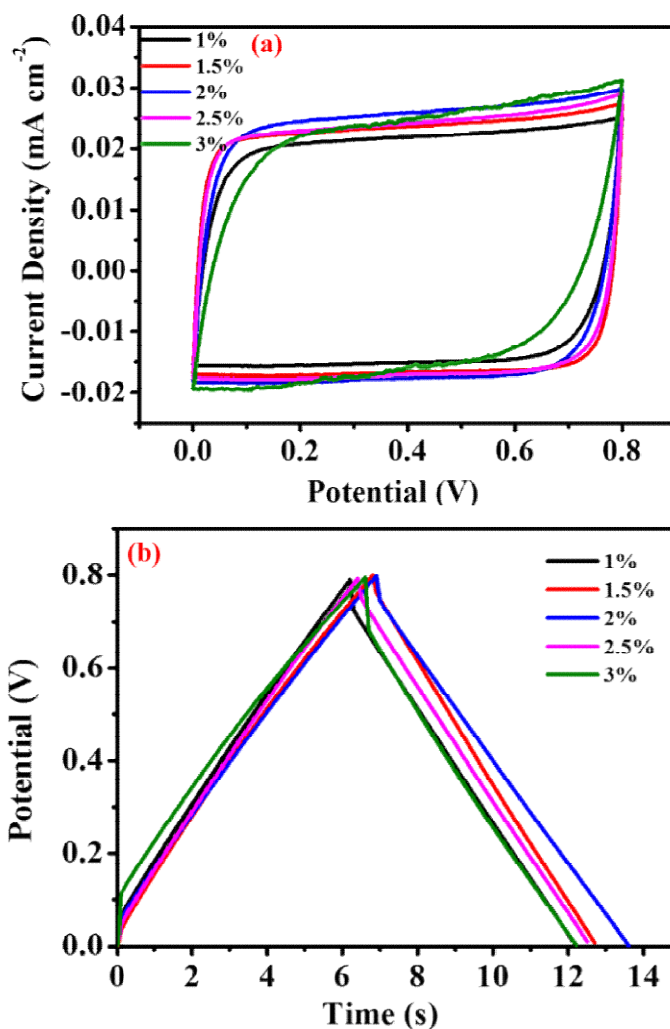

**Fig. S3.** The amount of the surfactant on the electrochemical performance of the supercapacitors. (a) The CV curves and (b) The GDC curves of the supercapacitor based on PEDOT:PSS electrodes doped with various volumes of the surfactant.

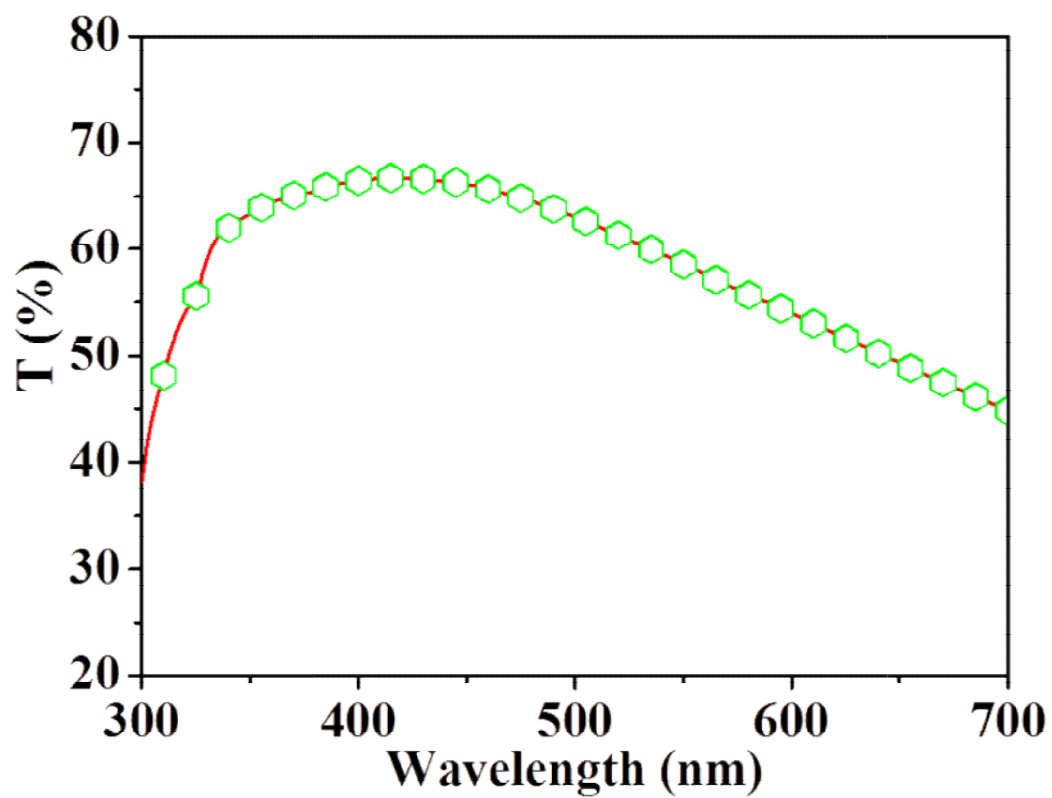

**Fig. S4.** The optical transmittance of the all-solid-state supercapacitor based on PEDOT:PSS electrodes with four layers.
